# Supplementary material
Source: Springer Nature journal article supplement (https://www.springermedizin.de/resource/supplementary/12955_2014_1301_MOESM1_ESM.pdf/9559516)

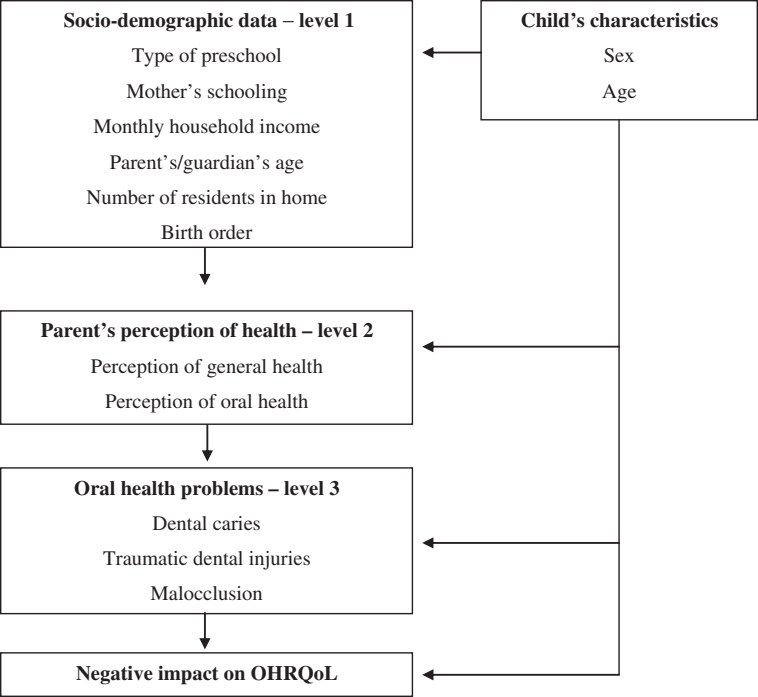

Supplement: MOESM1 [file 9559516]
